# Supplementary material for: Unravelling the dissociation pathways of acetic acid upon electron transfer in potassium collisions: experimental and theoretical studies
Source: Royal Society of Chemistry journal article supplement (doi:10.1039/c6cp06375f), 2016-11-23
Supplement: c6cp06375f1.pdf [file c6cp06375f1.pdf]

## Supporting Information for

### Unraveling the Dissociation Pathways of Acetic Acid upon Electron Transfer in Potassium Collisions: Experimental and Theoretical Studies

Guilherme Meneses<sup>[a]</sup>, Christoph Widmann<sup>[a]</sup>, Tiago Cunha<sup>[a]</sup>, Adrià Gil<sup>\*[b]</sup>, Filipe Ferreira da Silva<sup>\*[a]</sup>, Maria José Calhorda<sup>[b]</sup>, Paulo Limão-Vieira<sup>[a]</sup>

<sup>[a]</sup> Laboratório de Colisões Atômicas e Moleculares, CEFITEC, Departamento de Física, Faculdade de Ciências e Tecnologia, Universidade NOVA de Lisboa, Campus de Caparica  
2829-516 Caparica, Portugal

<sup>[b]</sup> Centro de Química e Bioquímica, Faculdade de Ciências, Universidade de Lisboa,  
Campo Grande, 1749-016 Lisboa, Portugal

This Supporting Information includes:

- relative energies associated to the conformational change from  $\text{HAc}^-$  to  $\text{HAc}^-(c)$  at  $\omega\text{B97X}/6\text{-}311\text{++G}(3\text{df},3\text{pd})$  level, charges and spin densities from the natural population analysis at  $\omega\text{B97X}/6\text{-}311\text{++G}(3\text{df},3\text{pd})$  level for all stationary points found in the energy profiles of Scheme 1 and Scheme 2,
- a detailed discussion of the mechanism associated to the direct OH fragmentation and formation of  $\text{OH}^\bullet$  along with the relative energies of the process at  $\omega\text{B97X}/6\text{-}311\text{++G}(3\text{df},3\text{pd})$  level of calculation and charge and spin density from natural population analysis also at  $\omega\text{B97X}/6\text{-}311\text{++G}(3\text{df},3\text{pd})$  level to describe this mechanism about formation of  $\text{OH}^\bullet$ ,
- relative energies at  $\omega\text{B97X}/6\text{-}311\text{++G}(3\text{df},3\text{pd})$  level for each stationary point of the analyzed pathways in Scheme 1 and Scheme 2 to release  $\text{OH}^-$  formation, relative energies of all the stationary points found in the two mechanisms associated to the production of  $\text{OH}^-$  at different levels of calculation:  $\text{LC-}\omega\text{PBE}/6\text{-}311\text{++G}(3\text{df},3\text{pd})$ ,  $\text{BHandHLYP}/6\text{-}311\text{++G}(3\text{df},3\text{pd})$ ,  $\text{M06HF}/6\text{-}311\text{++G}(3\text{df},3\text{pd})$ ,  $\text{MP2}/6\text{-}$

311++G(3df,3pd) and CCSD(T)/6-311++G(3df,3pd)//BHandHLYP/6-311++G(3df,3pd), and Cartesian coordinates of the optimized structures for the stationary points of the proposed mechanisms.

## Contents

### Tables

Table S1. Relative energies of the anionized acetic acid with respect to  $\text{HAc}^-$  structure at  $\omega\text{B97X}/6\text{-}311\text{++G}(3\text{df},3\text{pd})$  level. Zero point correction and thermal corrections to Gibbs free energy are included. Energies in eV.

Table S2. Charge (spin density) from natural population analysis at  $\omega\text{B97X}/6\text{-}311\text{++G}(3\text{df},3\text{pd})$  level for all stationary points found in the energy profiles of Scheme 1 and Scheme 2.

Table S3. Relative energies at  $\omega\text{B97X}/6\text{-}311\text{++G}(3\text{df},3\text{pd})$  level of calculation for each stationary point of the pathways to release  $\text{OH}^-$  considering  $\text{HAc}^-$  as asymptote. Inclusion of zero point correction and thermal corrections to Gibbs Free energy are also included. Energies in eV.

Table S4. Charge (spin density) from natural population analysis at  $\omega\text{B97X}/6\text{-}311\text{++G}(3\text{df},3\text{pd})$  level of calculation for all stationary points of Table S3.

Table S5. Relative energies at  $\omega\text{B97X}/6\text{-}311\text{++G}(3\text{df},3\text{pd})$  level for each stationary point of the analyzed pathways in Scheme 1 and Scheme 2 to release  $\text{OH}^-$  considering  $\text{HAc}^-$  as asymptote. Zero point correction and thermal corrections to Gibbs Free energy are also included. Energies in eV.

Table S6. Relative energies at  $\text{LC-}\omega\text{PBE}/6\text{-}311\text{++}(3\text{df},3\text{pd})$  level for each stationary point of the analyzed pathways in Scheme 1 and Scheme 2 to release  $\text{OH}^-$  considering  $\text{HAc}^-$  as

asymptote. Zero point correction and thermal corrections to Gibbs Free energy are also included. Energies in eV.

Table S7. Relative energies at BHandHLYP/6-311++(3df,3pd) level for each stationary point of the analyzed pathways in Scheme 1 and Scheme 2 to release OH<sup>-</sup> considering HAc<sup>-</sup> as asymptote. Zero point correction and thermal corrections to Gibbs Free energy are also included. Energies in eV.

Table S8. Relative energies at M06HF/6-311++(3df,3pd) level for each stationary point of the analyzed pathways in Scheme 1 and Scheme 2 to release OH<sup>-</sup> considering HAc<sup>-</sup> as asymptote. Zero point correction and thermal corrections to Gibbs Free energy are also included. Energies in eV.

Table S9. Relative energies at MP2/6-311++(3df,3pd) level for each stationary point of the analyzed pathways in Scheme 1 and Scheme 2 to release OH<sup>-</sup> considering HAc<sup>-</sup> as asymptote. Zero point correction and thermal corrections to Gibbs Free energy are also included. Energies in eV.

Table S10. Relative energies at CCSD(T)/6-311++G(3df,3pd)//BHandHLYP/6-311++G(3df,3pd) level for each stationary point of the analyzed pathways in Scheme 1 and Scheme 2 to release OH<sup>-</sup> considering HAc<sup>-</sup> as asymptote. Zero point correction and thermal corrections to Gibbs Free energy are also included. Energies in eV.

Table S11. Cartesian coordinates of the following optimized stationary points at  $\omega$ B97X/6-311++G(3df,3pd) level: HAc<sup>-</sup>, TS<sub>HAc/diol</sub>, diol<sup>-</sup>, TS<sub>diol/P•</sub>, P•···OH<sup>-</sup>, TS<sub>HAc/I1</sub>, I1, TS<sub>I1/I2</sub>, I2, TS<sub>I2/diol</sub>.

**Table S1.** Relative energies of the anionized acetic acid with respect to HAc<sup>-</sup> structure at  $\omega$ B97X/6-311++G(3df,3pd) level. Zero point correction and thermal corrections to Gibbs free energy are included. Energies in eV.

| System                    | $\Delta E$ | $\Delta E_{ZPE}$ | $\Delta G^\circ_{298K}$ |
|---------------------------|------------|------------------|-------------------------|
| HAc <sup>-</sup>          | 0.00       | 0.00             | 0.00                    |
| TS <sub>HAc/HAc-(c)</sub> | 0.32       | 0.25             | 0.26                    |
| HAc <sup>-</sup> (c)      | -0.12      | -0.12            | -0.12                   |
| diol <sup>-</sup>         | 1.13       | 1.10             | 1.10                    |

Table S2. Charge (spin density) from natural population analysis at  $\omega$ B97X/6-311++G(3df,3pd) level for all stationary points found in the energy profiles of Scheme 1 and Scheme 2.

| System                              | Fragment    |             |                 |
|-------------------------------------|-------------|-------------|-----------------|
|                                     | OH          | CO          | CH <sub>3</sub> |
| HAc <sup>-</sup>                    | -0.38(0.16) | 0.18(0.01)  | -0.81(0.83)     |
| TS <sub>HAc/diol</sub> <sup>a</sup> | -1.01(0.92) | 0.51(0.07)  | -0.50/(0.01)    |
| diol <sup>-a</sup>                  | -0.27(0.03) | -0.36(0.84) | -0.37(0.13)     |
| TS <sub>diol/P•</sub> <sup>a</sup>  | -0.32(0.81) | -0.27(0.20) | -0.41(0.00)     |
| P•...OH <sup>-a</sup>               | -0.69(0.42) | 0.01(0.63)  | -0.32(-0.06)    |
| TS <sub>HAc/I1</sub>                | -0.96(0.97) | 0.06(0.00)  | -0.10(0.02)     |
| I1                                  | -0.89(0.98) | 0.01(0.00)  | -0.12(0.02)     |
| TS <sub>I1/I2</sub> <sup>a</sup>    | -0.76(0.99) | 0.41(0.00)  | -0.65(0.00)     |
| I2 <sup>a</sup>                     | -0.86(0.97) | 0.38(0.00)  | -0.51(0.03)     |
| TS <sub>I2/diol</sub> <sup>a</sup>  | -0.94(0.93) | 0.39(0.02)  | -0.45(0.06)     |

<sup>a</sup>CO includes the H transferred from CH<sub>3</sub>, whereas such H is not included in CH<sub>3</sub>.

In the following paragraphs we describe the most intuitive reaction pathway leading to the formation of OH but as a neutral species (OH<sup>•</sup>). This pathway comes from the direct fragmentation of OH and the calculated energy profile is shown in Scheme 3, whereas relative energies including zero point corrections and entropic effects are depicted in Table S3. The computed mechanism involves two elementary steps. The first step corresponds to the OH fragmentation to form H<sub>2</sub>O via H transfer from CH<sub>3</sub>. In the second and final step one H of H<sub>2</sub>O is transferred to the C atom of COCH<sub>2</sub> to form the final products [CHOCH<sub>2</sub>]<sup>-</sup> and OH<sup>•</sup>.

**Table S3.** Relative energies at ωB97X/6-311++G(3df,3pd) level of calculation for each stationary point of the pathways to release OH<sup>•</sup> considering HAc<sup>-</sup> as asymptote. Inclusion of zero point correction and thermal corrections to Gibbs Free energy are also included. Energies in eV.

| System                            | Energy     |                  |                           |
|-----------------------------------|------------|------------------|---------------------------|
|                                   | $\Delta E$ | $\Delta E_{ZPE}$ | $\Delta G_{298K}^{\circ}$ |
| HAc <sup>-</sup>                  | 0.00       | 0.00             | 0.00                      |
| TS <sub>HAc/I3</sub>              | 1.51       | 1.31             | 1.26                      |
| I3                                | 0.42       | 0.26             | 0.20                      |
| TS <sub>I3/P-</sub>               | 1.74       | 1.53             | 1.51                      |
| P <sup>-</sup> ...OH <sup>•</sup> | 1.47       | 1.28             | 1.24                      |

The first step produces a H<sub>2</sub>O molecule and the [CH<sub>3</sub>CO]<sup>-</sup> species, such system being slightly less stable (0.2 eV) than the initial anionized acetic acid although the barrier to overcome the TS<sub>HAc/I3</sub> is not really very high, 1.3 eV, which is within our energy window of work (~3 eV) (see Table S3). Such energy cost is mainly due to the OH cleavage and geometric and electronic reorganizations. The resulting species of this step is a system consisting in H<sub>2</sub>O and the [CH<sub>3</sub>CO]<sup>-</sup> species and natural population analysis in Table S4 shows the electronic reorganization mentioned above. Indeed, in the anionized acetic acid the charge and spin was mainly localized at CH<sub>3</sub> group, whereas in the resulting product, charge is also distributed

along CO and the spin density is now localized at CO. Such NPA analysis also shows the neutral nature of the formed H<sub>2</sub>O.

**Table S4.** Charge (spin density) from natural population analysis at  $\omega$ B97X/6-311++G(3df,3pd) level of calculation for all stationary points of Table S3.

| System                             | Fragment    |             |                 |
|------------------------------------|-------------|-------------|-----------------|
|                                    | OH          | CO          | CH <sub>3</sub> |
| HAc <sup>-</sup>                   | -0.38(0.16) | 0.18(0.01)  | -0.81(0.83)     |
| TS <sub>HAc/I3</sub>               | -0.92(0.01) | -0.01(0.90) | -0.07(0.09)     |
| I3 <sup>a</sup>                    | -0.03(0.01) | -0.42(0.96) | -0.55(0.03)     |
| TS <sub>I3/P</sub> <sup>b</sup>    | -0.24(0.76) | -0.36(0.22) | -0.40(0.01)     |
| P <sup>-</sup> ...OH <sup>•b</sup> | -0.11(0.99) | -0.50(0.00) | -0.39(0.00)     |

<sup>a</sup>OH includes the H transferred from CH<sub>3</sub>, whereas H is not included in CH<sub>3</sub>.

<sup>b</sup>CO includes the H transferred from H<sub>2</sub>O, whereas one H is not included in CH<sub>3</sub>.

In the second and last step the OH<sup>•</sup> is produced via H transfer from H<sub>2</sub>O to [CH<sub>2</sub>CO]<sup>-</sup> species. This last product is 1.0 eV less stable than its precursor and remains 1.2 eV above the asymptote (HAc<sup>-</sup>). Also, an energy barrier of 1.3 eV has also to be overcome in the transition state TS<sub>I3/P</sub>. Natural population analysis confirms the radical nature of the released OH being the computed spin density 0.99 and the anionic nature the CH<sub>2</sub>COH fragment being the computed charge -0.89 in this fragment.

**Table S5.** Relative energies at  $\omega$ B97X/6-311++G(3df,3pd) level for each stationary point of the analyzed pathways in Scheme 1 and Scheme 2 to release OH<sup>-</sup> considering HAc<sup>-</sup> as asymptote. Zero point correction and thermal corrections to Gibbs Free energy are also included. Energies in eV.

| System                             | Energy     |                  |                           |
|------------------------------------|------------|------------------|---------------------------|
|                                    | $\Delta E$ | $\Delta E_{ZPE}$ | $\Delta G^{\circ}_{298K}$ |
| HAc <sup>-</sup>                   | 0.00       | 0.00             | 0.00                      |
| TS <sub>HAc/diol</sub>             | 3.05       | 2.86             | 2.88                      |
| diol <sup>-</sup>                  | 1.13       | 1.10             | 1.10                      |
| TS <sub>diol/P</sub> <sup>•</sup>  | 3.29       | 2.99             | 2.94                      |
| P <sup>•</sup> ····OH <sup>-</sup> | 3.26       | 2.98             | 2.92                      |
| TS <sub>HAc/I1</sub>               | 0.81       | 0.51             | 0.46                      |
| I1                                 | 0.77       | 0.47             | 0.39                      |
| TS <sub>I1/I2</sub>                | 3.20       | 2.72             | 2.67                      |
| I2                                 | 2.00       | 1.68             | 1.65                      |
| TS <sub>I2/diol</sub>              | 2.04       | 1.72             | 1.71                      |

**Table S6.** Relative energies at LC- $\omega$ PBE/6-311++(3df,3pd) level for each stationary point of the analyzed pathways in Scheme 1 and Scheme 2 to release OH<sup>-</sup> considering HAc<sup>-</sup> as asymptote. Zero point correction and thermal corrections to Gibbs Free energy are also included. Energies in eV.

| System                            | Energy     |                  |                           |
|-----------------------------------|------------|------------------|---------------------------|
|                                   | $\Delta E$ | $\Delta E_{ZPE}$ | $\Delta G^{\circ}_{298K}$ |
| HAc <sup>-</sup>                  | 0.00       | 0.00             | 0.00                      |
| TS <sub>HAc/diol</sub>            | 2.98       | 2.79             | 2.81                      |
| diol <sup>-</sup>                 | 1.11       | 1.08             | 1.09                      |
| TS <sub>diol/P<sup>•</sup></sub>  | 3.55       | 3.25             | 3.20                      |
| P <sup>•</sup> ...OH <sup>-</sup> | 3.19       | 3.05             | 3.00                      |
| TS <sub>HAc/I1</sub>              | 0.81       | 0.49             | 0.44                      |
| I1                                | 0.78       | 0.47             | 0.40                      |
| TS <sub>I1/I2</sub>               | 3.13       | 2.66             | 2.60                      |
| I2                                | 2.02       | 1.69             | 1.65                      |
| TS <sub>I2/diol</sub>             | 2.05       | 1.71             | 1.72                      |



**Table S7.** Relative energies at BHandHLYP/6-311++(3df,3pd) level for each stationary point of the analyzed pathways in Scheme 1 and Scheme 2 to release OH<sup>-</sup> considering HAc<sup>-</sup> as asymptote. Zero point correction and thermal corrections to Gibbs Free energy are also included. Energies in eV.

| System                            | Energy     |                  |                           |
|-----------------------------------|------------|------------------|---------------------------|
|                                   | $\Delta E$ | $\Delta E_{ZPE}$ | $\Delta G_{298K}^{\circ}$ |
| HAc <sup>-</sup>                  | 0.00       | 0.00             | 0.00                      |
| TS <sub>HAc/diol</sub>            | 3.23       | 2.98             | 2.99                      |
| diol <sup>-</sup>                 | 1.13       | 1.10             | 1.11                      |
| TS <sub>diol/P<sup>•</sup></sub>  | 3.49       | 3.22             | 3.17                      |
| P <sup>•</sup> ...OH <sup>-</sup> | 3.31       | 3.07             | 3.02                      |
| TS <sub>HAc/I1</sub>              | 1.10       | 0.78             | 0.73                      |
| I1                                | 1.05       | 0.74             | 0.68                      |
| TS <sub>I1/I2</sub>               | 3.61       | 3.14             | 3.10                      |
| I2                                | 2.22       | 1.90             | 1.87                      |
| TS <sub>I2/diol</sub>             | 2.26       | 1.93             | 1.92                      |

**Table S8.** Relative energies at M06HF/6-311++(3df,3pd) level for each stationary point of the analyzed pathways in Scheme 1 and Scheme 2 to release OH<sup>-</sup> considering HAc<sup>-</sup> as asymptote. Zero point correction and thermal corrections to Gibbs Free energy are also included. Energies in eV.

| System                            | Energy     |                  |                           |
|-----------------------------------|------------|------------------|---------------------------|
|                                   | $\Delta E$ | $\Delta E_{ZPE}$ | $\Delta G^{\circ}_{298K}$ |
| HAc <sup>-</sup>                  | 0.00       | 0.00             | 0.00                      |
| TS <sub>HAc/diol</sub>            | 3.01       | 2.77             | 2.78                      |
| diol <sup>-</sup>                 | 0.91       | 0.88             | 0.88                      |
| TS <sub>diol/P<sup>•</sup></sub>  | 3.71       | 3.43             | 3.40                      |
| P <sup>•</sup> ···OH <sup>-</sup> | 3.41       | 3.18             | 3.14                      |
| TS <sub>HAc/I1</sub>              | 1.29       | 0.98             | 0.96                      |
| I1                                | 1.10       | 0.80             | 0.74                      |
| TS <sub>I1/I2</sub>               | 3.36       | 2.89             | 2.85                      |
| I2                                | 2.08       | 1.75             | 1.72                      |
| TS <sub>I2/diol</sub>             | 2.23       | 1.90             | 1.89                      |

**Table S9.** Relative energies at MP2/6-311++(3df,3pd) level for each stationary point of the analyzed pathways in Scheme 1 and Scheme 2 to release OH<sup>-</sup> considering HAc<sup>-</sup> as asymptote. Zero point correction and thermal corrections to Gibbs Free energy are also included. Energies in eV.

| System                 | Energy     |                  |                           |
|------------------------|------------|------------------|---------------------------|
|                        | $\Delta E$ | $\Delta E_{ZPE}$ | $\Delta G_{298K}^{\circ}$ |
| HAc <sup>-</sup>       | 0.00       | 0.00             | 0.00                      |
| TS <sub>HAc/diol</sub> | 3.04       | 2.86             | 2.88                      |
| diol <sup>-</sup>      | 1.14       | 1.10             | 1.10                      |
| TS <sub>diol/P•</sub>  | 4.01       | 3.75             | 3.71                      |
| P•···OH <sup>-</sup>   | 3.68       | 3.45             | 3.40                      |
| TS <sub>HAc/I1</sub>   | 0.97       | 0.67             | 0.65                      |
| I1                     | 0.87       | 0.55             | 0.42                      |
| TS <sub>I1/I2</sub>    | 3.14       | 2.67             | 2.57                      |
| I2                     | 2.02       | 1.67             | 1.58                      |
| TS <sub>I2/diol</sub>  | 2.10       | 1.78             | 1.77                      |

**Table S10.** Relative energies at CCSD(T)/6-311++G(3df,3pd)//BHandHLYP/6-311++G(3df,3pd) level for each stationary point of the analyzed pathways in Scheme 1 and Scheme 2 to release OH<sup>-</sup> considering HAc<sup>-</sup> as asymptote. Zero point correction and thermal corrections to Gibbs Free energy are also included. Energies in eV.

| System                            | Energy     |                  |                           |
|-----------------------------------|------------|------------------|---------------------------|
|                                   | $\Delta E$ | $\Delta E_{ZPE}$ | $\Delta G^{\circ}_{298K}$ |
| HAc <sup>-</sup>                  | 0.00       | 0.00             | 0.00                      |
| TS <sub>HAc/diol</sub>            | 2.95       | 2.71             | 2.72                      |
| diol <sup>-</sup>                 | 1.13       | 1.10             | 1.11                      |
| TS <sub>diol/P<sup>•</sup></sub>  | 3.44       | 3.17             | 3.12                      |
| P <sup>•</sup> ...OH <sup>-</sup> | 3.39       | 3.15             | 3.10                      |
| TS <sub>HAc/I1</sub>              | 1.03       | 0.72             | 0.66                      |
| I1                                | 0.99       | 0.68             | 0.62                      |
| TS <sub>I1/I2</sub>               | 3.34       | 2.87             | 2.84                      |
| I2                                | 2.16       | 1.84             | 1.81                      |
| TS <sub>I2/diol</sub>             | 2.18       | 1.86             | 1.84                      |

**Table S11.** Cartesian coordinates of the following optimized stationary points at  $\omega$ B97X/6-311++G(3df,3pd) level:  $\text{HAc}^-$ ,  $\text{TS}_{\text{HAc/diol}}$ ,  $\text{diol}^-$ ,  $\text{TS}_{\text{diol/P}\cdot}$ ,  $\text{P}\cdot\cdots\text{OH}^-$ ,  $\text{TS}_{\text{HAc/I1}}$ , I1,  $\text{TS}_{\text{I1/I2}}$ , I2,

$\text{TS}_{\text{I2/diol}}$ .

8

$\text{HAc}^-$

|   |              |              |              |
|---|--------------|--------------|--------------|
| C | 0.006954000  | 0.009628000  | 1.453989000  |
| C | 0.051783000  | 0.069321000  | -0.039917000 |
| O | 1.014151000  | 0.346812000  | -0.711372000 |
| O | -1.136127000 | -0.229052000 | -0.594351000 |
| H | 0.976831000  | 0.255190000  | 1.874402000  |
| H | -0.748144000 | 0.699770000  | 1.828840000  |
| H | -0.297716000 | -0.986014000 | 1.774756000  |
| H | -1.021520000 | -0.168115000 | -1.551758000 |

8

$\text{TS}_{\text{HAc/diol}}$

|   |              |              |              |
|---|--------------|--------------|--------------|
| C | -0.170794000 | -0.048200000 | 0.114040000  |
| C | -0.183032000 | 0.137455000  | 1.543368000  |
| H | 1.187664000  | -0.010341000 | 0.912868000  |
| H | -0.925973000 | 0.810752000  | 1.961822000  |
| H | -0.167528000 | -0.828617000 | 2.045710000  |
| O | -1.132614000 | 0.142985000  | -0.721616000 |
| O | 1.025315000  | -0.355010000 | -0.241616000 |
| H | -0.827766000 | 0.150976000  | -1.669581000 |

8

$\text{diol}^-$

|   |              |              |              |
|---|--------------|--------------|--------------|
| C | -0.507817000 | 0.104237000  | 1.548425000  |
| C | -0.213284000 | 0.003860000  | 0.254755000  |
| O | 0.983761000  | -0.177022000 | -0.315410000 |
| O | -1.169316000 | 0.079446000  | -0.708448000 |
| H | 1.707633000  | -0.237971000 | 0.341537000  |
| H | -1.537515000 | 0.250107000  | 1.839868000  |
| H | 0.272542000  | 0.040336000  | 2.288942000  |
| H | -0.707788000 | -0.021455000 | -1.546077000 |

8

$\text{TS}_{\text{diol/P}\cdot}$

|   |              |              |              |
|---|--------------|--------------|--------------|
| C | -0.361148000 | 0.187892000  | 1.507023000  |
| C | -0.018230000 | 0.013012000  | 0.221615000  |
| O | 1.313000000  | -0.239273000 | -0.063561000 |
| O | -1.797231000 | -0.346388000 | -1.656575000 |
| H | 1.802503000  | -0.275222000 | 0.770925000  |
| H | -1.390515000 | 0.371052000  | 1.787189000  |
| H | 0.380189000  | 0.144622000  | 2.319029000  |

H -1.067353000 0.124843000 -1.110053000

8

P ····OH-

|   |              |              |              |
|---|--------------|--------------|--------------|
| C | -0.343480000 | 0.181953000  | 1.530396000  |
| C | -0.044070000 | -0.056274000 | 0.239425000  |
| O | 1.305131000  | -0.269142000 | -0.045308000 |
| O | -1.808122000 | -0.181649000 | -1.817943000 |
| H | 1.805901000  | -0.203501000 | 0.780196000  |
| H | -1.366976000 | 0.357599000  | 1.840529000  |
| H | 0.423977000  | 0.208961000  | 2.319651000  |
| H | -1.078147000 | -0.118409000 | -0.999355000 |

8

TSHAc/I1

|   |              |              |              |
|---|--------------|--------------|--------------|
| C | 0.023727000  | 0.012255000  | 1.505410000  |
| C | 0.024525000  | 0.062110000  | -0.031328000 |
| O | 1.066813000  | 0.357139000  | -0.612186000 |
| O | -1.113417000 | -0.223325000 | -0.537798000 |
| H | 1.009394000  | 0.262987000  | 1.896545000  |
| H | -0.719498000 | 0.711398000  | 1.892495000  |
| H | -0.265517000 | -0.986366000 | 1.837303000  |
| H | -1.184813000 | -0.198660000 | -2.003851000 |

8

I1

|   |              |              |              |
|---|--------------|--------------|--------------|
| C | 0.042365000  | 0.015618000  | 1.546902000  |
| C | -0.007900000 | 0.052227000  | 0.002801000  |
| O | 1.036476000  | 0.349585000  | -0.595462000 |
| O | -1.138811000 | -0.233327000 | -0.476904000 |
| H | 1.037833000  | 0.268922000  | 1.911623000  |
| H | -0.689857000 | 0.717823000  | 1.951070000  |
| H | -0.237520000 | -0.980570000 | 1.896015000  |
| H | -1.206372000 | -0.192741000 | -2.377454000 |

8

TSI1/I2

|   |              |              |              |
|---|--------------|--------------|--------------|
| C | -0.064502000 | 0.098189000  | 1.714643000  |
| C | -0.265810000 | -0.047045000 | 0.230060000  |
| O | 0.969186000  | 0.071414000  | -0.245335000 |
| O | -1.270687000 | -0.194341000 | -0.454683000 |
| H | 1.160502000  | 0.341562000  | 0.895914000  |
| H | -0.864814000 | 0.637840000  | 2.227660000  |
| H | 0.039527000  | -0.896680000 | 2.160489000  |
| H | -0.872185000 | -0.014401000 | -2.670154000 |

8

I2

|   |              |              |              |
|---|--------------|--------------|--------------|
| C | -0.412173000 | 0.119467000  | 1.609868000  |
| C | -0.300901000 | -0.214040000 | 0.276955000  |
| O | 1.003709000  | -0.393464000 | -0.223789000 |
| O | -1.203407000 | -0.392202000 | -0.568533000 |
| H | 1.600818000  | -0.166345000 | 0.490114000  |
| H | -1.391670000 | 0.280464000  | 2.035466000  |
| H | 0.454772000  | 0.174504000  | 2.258828000  |
| H | -0.883934000 | 0.632153000  | -2.165315000 |

8

|           |              |              |              |
|-----------|--------------|--------------|--------------|
| TSI2/diol |              |              |              |
| C         | -0.428023000 | 0.147124000  | 1.532170000  |
| C         | -0.239013000 | -0.237789000 | 0.234910000  |
| O         | 1.065058000  | -0.472281000 | -0.203068000 |
| O         | -1.118503000 | -0.413116000 | -0.664668000 |
| H         | 1.648233000  | -0.188142000 | 0.502187000  |
| H         | -1.425989000 | 0.366957000  | 1.879539000  |
| H         | 0.394958000  | 0.193746000  | 2.236430000  |
| H         | -1.035507000 | 0.584039000  | -1.741906000 |
